# Supplementary material for: Role of inheritance during tectonic inversion of a rift system in a thick- to thin-skin transition: Analogue modelling and application to the Pyrenean – Biscay System
Source: Copernicus journal article supplement (doi:10.5194/egusphere-2022-1175), 2022-11-18
Supplement: Supplementary file [file egusphere-2022-1175-AC1-supplement.pdf]

**Review of “Role of inheritance during tectonic inversion of a rift system in a thick- to thin-skin transition: Analogue modelling and application to the Pyrenean – Biscay System”.**

Authors: Jordi Miró, Oriol Ferrer, Josep Anton Muñoz and Gianreto Manastchal

I enjoyed reading this manuscript - it presents well designed and executed sandbox modelling experiment, and analysis of obtained results with clear and convincing comparison to the real-world case study in the Pyrenees. I spotted only bunch of technical corrections that might be considered by the authors, see attached annotated pdf file, other than that this ms is basically good to go.

I'm looking forward reading the final version.

Piotr Krzywiec

***Author's reply:** We thank Piotr Krzywiec for his review and the positive assessment of our manuscript. We have processed the minor comments in the revised manuscript. All of them can be checked in the tracked change version of the manuscript.*
